# Supplementary material for: Sources and processes of iron aerosols in a megacity in Eastern China
Source: Copernicus journal article supplement (doi:10.5194/acp-22-2191-2022), 2022-02-17
Supplement: Supplementary file 1 [file acp-22-2191-2022-supplement.pdf]

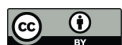

*Supplement of*

## **Sources and processes of iron aerosols in a megacity in Eastern China**

**Yanhong Zhu et al.**

*Correspondence to:* Weijun Li (liweijun@zju.edu.cn) and Zongbo Shi (z.shi@bham.ac.uk)

The copyright of individual parts of the supplement might differ from the article licence.

**Table S1. Sampling periods and sample numbers.**

|       | <b>Sampling periods</b>                                | <b>Sample number</b> |
|-------|--------------------------------------------------------|----------------------|
| Haze  | December 2018-January 2019, December 2019-January 2020 | 34                   |
| Fog   | November 2018-April 2019, December 2019-January 2020   | 17                   |
| Dust  | October 2019-November 2019                             | 12                   |
| Clear | September 2019, December 2019-January 2020             | 37                   |
| Rain  | December 2019-January 2020                             | 9                    |

35

**Table S2. Definitions of haze, fog, dust, clear, and rain weather conditions.**

|       | <b>Definition</b>                                                                                                                                                                                                                                                               |
|-------|---------------------------------------------------------------------------------------------------------------------------------------------------------------------------------------------------------------------------------------------------------------------------------|
| Haze  | The meteorological definition of haze is a kind of weather phenomenon in which a large number of tiny dust particles, smoke particles or salt particles suspended in the atmosphere, the relative humidity is less than 80%, and the horizontal visibility drops below 10 km.   |
| Fog   | The meteorological definition of fog is tiny water droplets suspended in the air, and horizontal visibility is less than 1 km, the relative humidity is higher than 90%.                                                                                                        |
| Dust  | Dust is a kind of natural meteorological phenomenon associated with strong cold front from Northwest China. The FLEXible PARTicle (FLEXPART) Lagrangian particle dispersion model shows that air mass backward trajectories of typical dust events crossed East Asia (Fig. S1). |
| Clear | Clear weather samples were collected when PM <sub>2.5</sub> concentration was less than 75 µg m <sup>-3</sup> , and visibility was greater than 10 km.                                                                                                                          |
| Rain  | Rain refers to the liquid droplets falling to the ground from the above cloud. We collected PM <sub>2.5</sub> samples as rain samples when precipitation intensity < 10 mm d <sup>-1</sup> .                                                                                    |

40

45 **Table S3. Results obtained from the analysis of NIST standard reference sample and field blanks using EDXRF (in  $\mu\text{g cm}^{-2}$ ).**

| <b>Elements</b> | <b>Certified values</b> | <b>EDXRF values</b> | <b>Field blanks</b> |
|-----------------|-------------------------|---------------------|---------------------|
| Na              | 0.074                   | 0.081               | $0.009 \pm 0.002$   |
| Mg              | 1.412                   | 1.417               | $0.004 \pm 0.000$   |
| Al              | 2.519                   | 2.321               | $0.139 \pm 0.002$   |
| K               | 0.644                   | 0.615               | $0.033 \pm 0.005$   |
| Ca              | 1.426                   | 1.417               | $0.015 \pm 0.003$   |
| Ti              | 0.163                   | 0.151               | $0.008 \pm 0.002$   |
| V               | 0.003                   | 0.003               | BDL                 |
| Cr              | 0.023                   | 0.021               | 0                   |
| Mn              | 0.037                   | 0.036               | $0.001 \pm 0.000$   |
| Fe              | 2.772                   | 2.743               | $0.029 \pm 0.004$   |
| Co              | 0.008                   | 0.008               | 0                   |
| Ni              | 0.024                   | 0.022               | 0                   |
| Cu              | 0.052                   | 0.048               | $0.002 \pm 0.000$   |
| Zn              | 0.177                   | 0.174               | $0.003 \pm 0.000$   |
| Ga              | 0                       | 0                   | BDL                 |
| Sr              | 0.007                   | 0.006               | 0                   |
| Ba              | 0.068                   | 0.062               | $0.003 \pm 0.000$   |
| Pb              | 0.041                   | 0.038               | $0.002 \pm 0.000$   |
| P               | 0.061                   | 0.061               | $0.003 \pm 0.000$   |
| S               | 0.165                   | 0.151               | $0.011 \pm 0.001$   |
| Cl              | 0.135                   | 0.122               | $0.008 \pm 0.000$   |
| As              | 0                       | 0                   | BDL                 |
| Se              | 0                       | 0                   | 0                   |

BDL: below detection limit.

**Table S4. Significance T test matrix of PM<sub>2.5</sub>, total Fe, dissolved Fe and Fe solubility levels between different weather conditions.**

|                   |       | <b>Haze</b> | <b>Fog</b> | <b>Dust</b> | <b>Clear</b> | <b>Rain</b> |
|-------------------|-------|-------------|------------|-------------|--------------|-------------|
| PM <sub>2.5</sub> | Haze  |             | 0.000**    | 0.000**     | 0.000**      | 0.000**     |
|                   | Fog   | 0.000**     |            | 0.000**     | 0.000**      | 0.000**     |
|                   | Dust  | 0.000**     | 0.000**    |             | 0.000**      | 0.000**     |
|                   | Clear | 0.000**     | 0.000**    | 0.000**     |              | 0.000**     |
|                   | Rain  | 0.000**     | 0.000**    | 0.000**     | 0.000**      |             |
| Total Fe          | Haze  |             | 0.040*     | 0.002**     | 0.113        | 0.031*      |
|                   | Fog   | 0.040*      |            | 0.001**     | 0.581        | 0.045*      |
|                   | Dust  | 0.002**     | 0.001**    |             | 0.000**      | 0.001**     |
|                   | Clear | 0.113       | 0.581      | 0.000**     |              | 0.036*      |
|                   | Rain  | 0.031*      | 0.045*     | 0.001**     | 0.036*       |             |
| Dissolved Fe      | Haze  |             | 0.007**    | 0.003**     | 0.000**      | 0.000**     |
|                   | Fog   | 0.007**     |            | 0.025*      | 0.000**      | 0.010*      |
|                   | Dust  | 0.003**     | 0.025*     |             | 0.000**      | 0.000**     |
|                   | Clear | 0.000**     | 0.000**    | 0.000**     |              | 0.008**     |
|                   | Rain  | 0.000**     | 0.010*     | 0.000**     | 0.008**      |             |
| Fe solubility     | Haze  |             | 0.004**    | 0.007**     | 0.000**      | 0.001**     |
|                   | Fog   | 0.004**     |            | 0.000**     | 0.000**      | 0.000**     |
|                   | Dust  | 0.007**     | 0.000**    |             | 0.008**      | 0.022*      |
|                   | Clear | 0.000**     | 0.000**    | 0.008**     |              | 0.026*      |
|                   | Rain  | 0.001**     | 0.000**    | 0.022*      | 0.026*       |             |

\* represents a significant difference between the two groups at the 0.05 level (2-tailed).

55 \*\* represents a significant difference between the two groups at the 0.01 level (2-tailed).

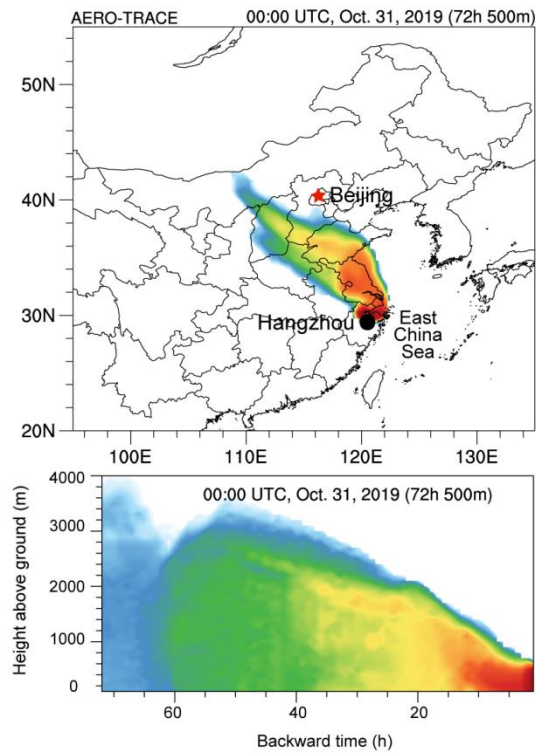

65

**Figure S1. Backward trajectories of air masses in dust weather condition (duration: 72 h; height: 500 m above ground level).**

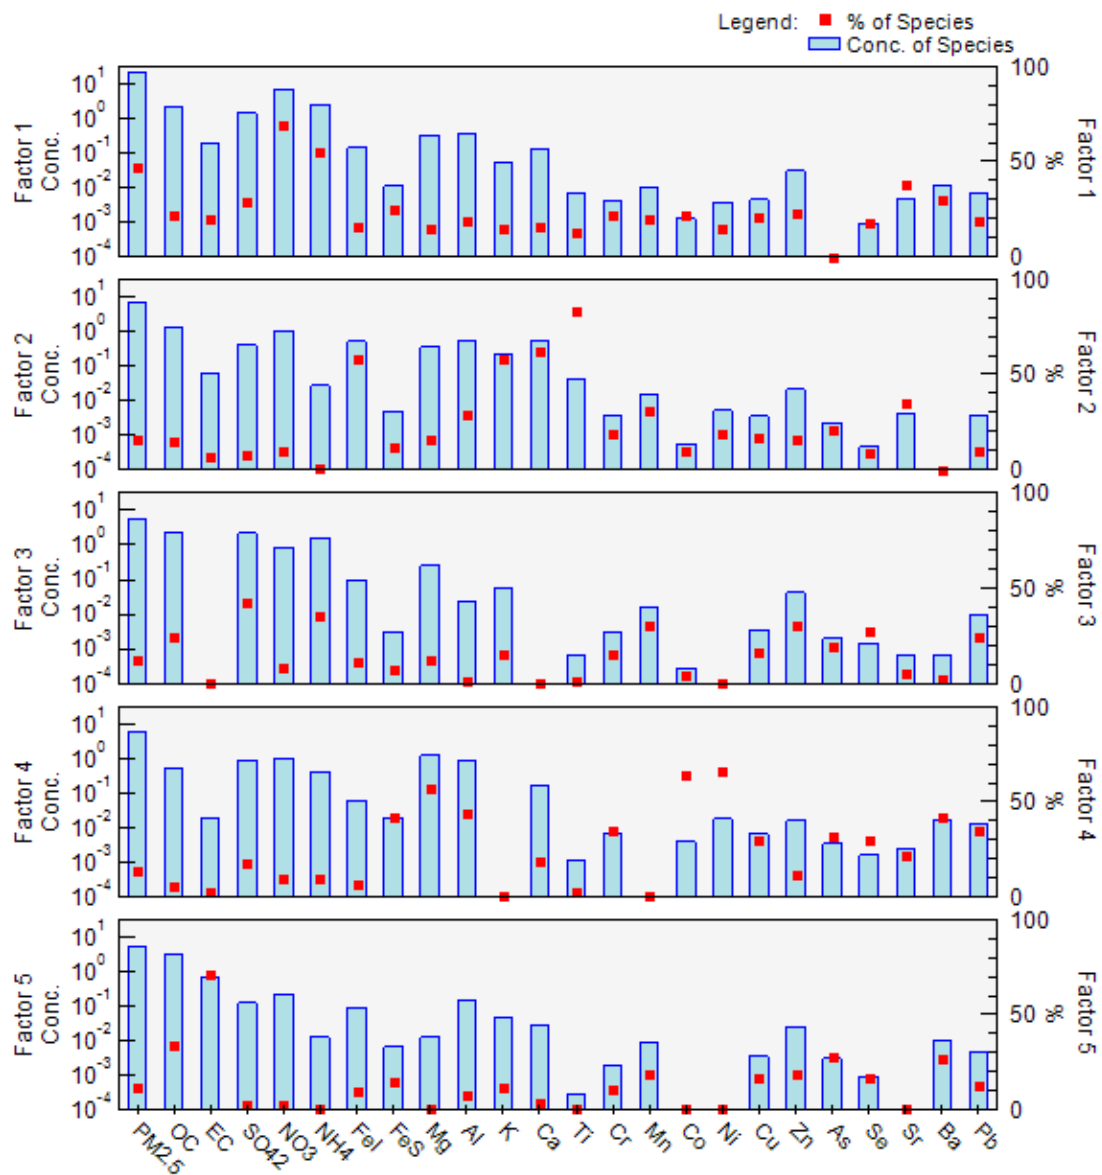

Figure S2. Source profiles deduced from PMF analysis (5 factors).

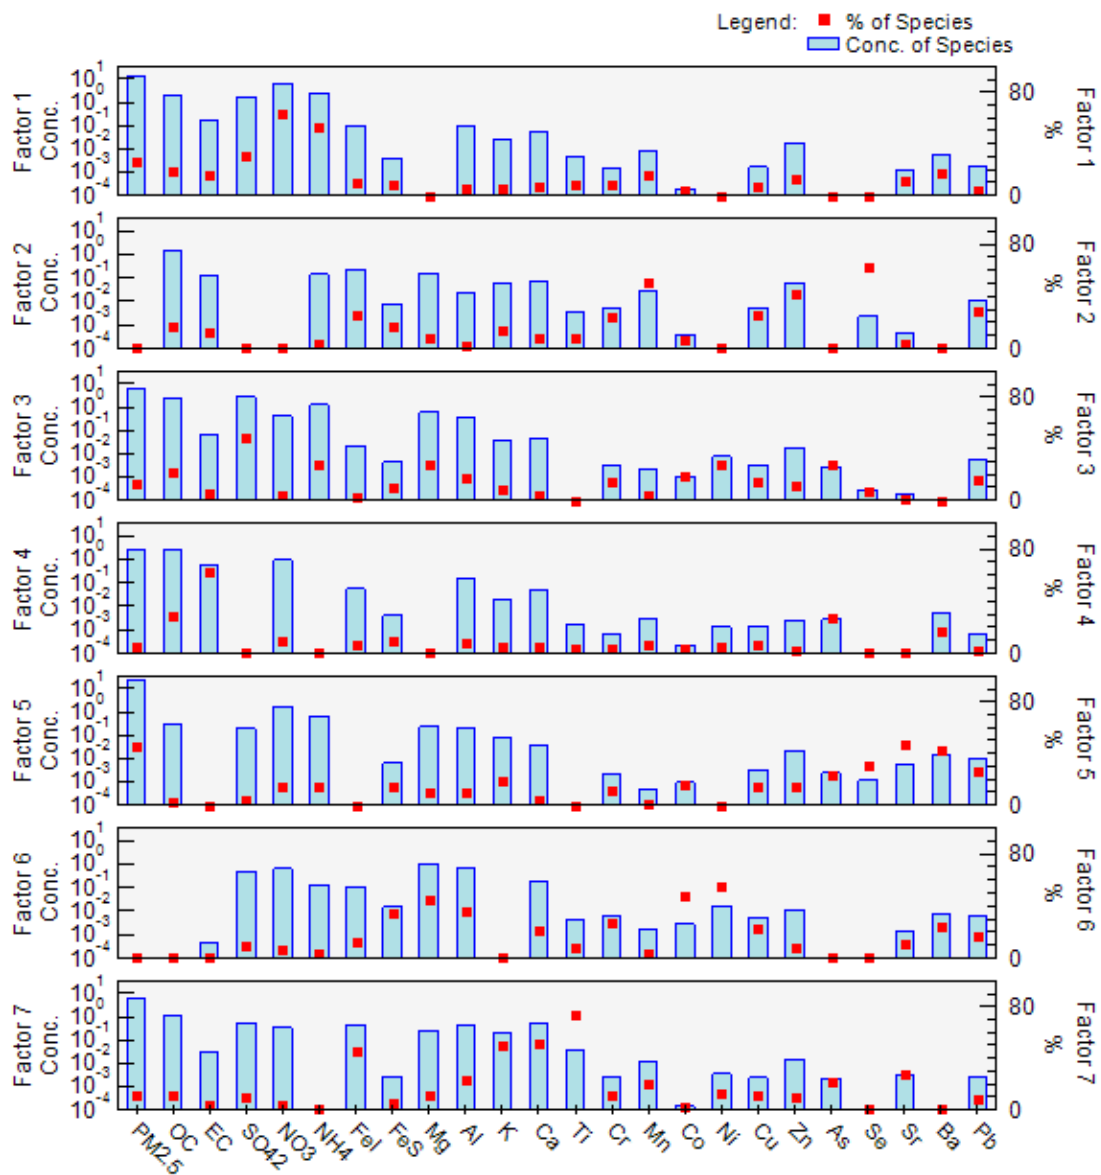

Figure S3. Source profiles deduced from PMF analysis (7 factors).

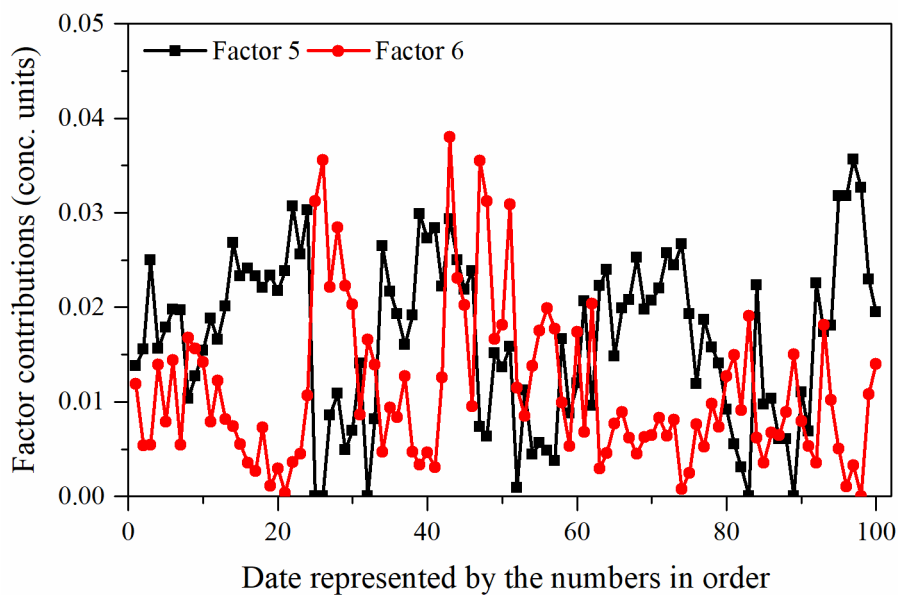

80 **Figure S4. Time series of factor 5 and 6 contributions (conc.units).** Since the sampling time of different weathers is intermittent, the date is replaced by sequential numbers.

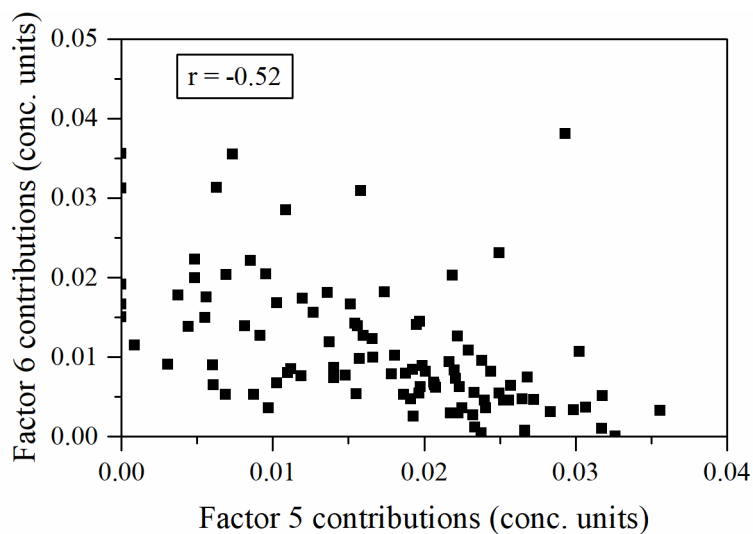

85

**Figure S5. The correlation between factor 5 and 6 contributions (conc.units).**
